# Supplementary material for: Neonatal Magnesemia in Preterm Neonates Unexposed to Maternal MgSO4 Administration and in Neonates Exposed for Fetal Neuroprotection or Maternal Eclampsia Prevention.
Source: Research Square preprint supplement (doi:10.21203/rs.3.rs-1108596/v1), 2021-11-29
Supplement: Supplementary file 1 [file 444ba57f97c706d8c908a8d8.docx]

|  | Control group  geometric mean (mmol/l)  [95%CI] | Neuroprotection group  geometric mean (mmol/l)  [95%CI] | Preeclampsia group  geometric mean (mmol/l)  [95%CI] |
| --- | --- | --- | --- |
| Day of birth | 0.800  [0.785, 0.816] | 1.103  [1.065, 1.143] | 1.591  [1.534, 1.651] |
| Day 1 | 0.909  [0.891, 0.926] | 1.127  [1.089, 1.166] | 1.460  [1.408, 1.515] |
| 2 | 1.039  [1.019, 1.059] | 1.165  [1.126, 1.205] | 1.358  [1.309, 1.407] |
| 3 | 1.106  [1.085, 1.128] | 1.160  [1.121, 1.200] | 1.261  [1.216, 1.307] |
| 4 | 1.093  [1.072, 1.115] | 1.126  [1.087, 1.165] | 1.147  [1.105, 1.190] |
| 5 | 1.039  [1.018, 1.061] | 1.059  [1.021, 1.098] | 1.052  [1.014, 1.090] |
| 6 | 0.996  [0.976, 1.018] | 1.020  [0.984, 1.057] | 0.987  [0.951, 1.025] |
| 7 | 0.954  [0.934, 0.974] | 0.969  [0.931, 1.010] | 0.934  [0.897, 0.974] |
| 8 | 0.913  [0.893, 0.934] | 0.941  [0.906, 0.979] | 0.934  [0.897, 0.974] |
| 9 | 0.899  [0.879, 0.920] | 0.920  [0.886, 0.956] | 0.899  [0.864, 0.936] |
| 10 | 0.881  [0.879, 0.920] | 0.920  [0.882, 0.959] | 0.866  [0.831, 0.903] |
| 11 | 0.889  [0.861, 0.902] | 0.873  [0.838, 0.909] | 0.841  [0.805, 0.880] |
| 12 | 0.865  [0.844, 0.887] | 0.897  [0.858, 0.938] | 0.860  [0.824, 0.897] |
| 13 | 0.875  [0.854, 0.897] | 0.881  [0.847, 0.917] | 0.846  [0.812, 0.883] |
| 14 | 0.885  [0.862, 0.908] | 0.875  [0.834, 0.918] | 0.852  [0.813, 0.893] |
